# Supplementary material
Source: Springer Nature journal article supplement (https://www.springermedizin.de/resource/supplementary/12885_2001_18_MOESM1_ESM.pdf/9460022)
Supplement: MOESM1 [file 9460022]

A. Orntide acetate (C<sub>81</sub>H<sub>106</sub>N<sub>18</sub>O<sub>14</sub>Cl, MW<sub>avg</sub> 1591.31)

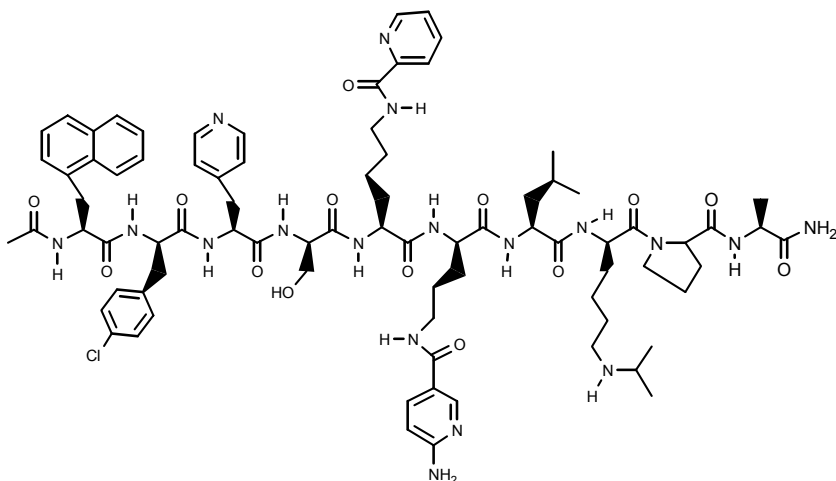

AcDNaI<sup>1</sup>-DpClPhe<sup>2</sup>-D3Pal<sup>3</sup>-Ser<sup>4</sup>-PicLys<sup>5</sup>-D(6Anic)Orn<sup>6</sup>-Leu<sup>7</sup>-IprLys<sup>8</sup>-Pro<sup>9</sup>-  
DAIa<sup>10</sup>-NH<sub>2</sub>

|           |                                          |
|-----------|------------------------------------------|
| AcDNaI    | N-acetyl-3-(12-naphthyl) alanine         |
| DpClPhe   | 4-(4-chlorophenyl)-2-amino-butanoic acid |
| DPal      | 3-(3-pyridyl) alanine                    |
| PicLys    | Nε-picolinoyllysine                      |
| D6AnicOrn | 6-aminonicotinoyl ornithine              |
| IprLys    | Nε-isopropyllysine                       |

B. GnRH

Pyro-Glu<sup>1</sup>-His<sup>2</sup>-Trp<sup>3</sup>-Ser<sup>4</sup>-Tyr<sup>5</sup>-Gly<sup>6</sup>-Leu<sup>7</sup>-Arg<sup>8</sup>-Pro<sup>9</sup>-Gly<sup>10</sup>-NH<sub>2</sub>

C. Leuprolide

5-oxo-Pro<sup>1</sup>-His<sup>2</sup>-Trp<sup>3</sup>-Ser<sup>4</sup>-Tyr<sup>5</sup>-D-Leu<sup>6</sup>-Leu<sup>7</sup>-Arg<sup>8</sup>-Pro<sup>9</sup>-NH<sub>2</sub>
